# Supplementary material
Source: publisher figshare collection journal article supplement (https://gsajournals.figshare.com/ndownloader/files/26557613)
Supplement: Supplementary file 1 [file 26557613]

## Sheet: Sheet1
Table S4. Genome assembly statistics of Hermetia illucens.
Scaffold ID	Size (bp)	%	GC (%)
S1	222122703	22.103	42.21
S2	191142057	19.02	42.41
S3	180357958	17.947	42.5
S4	173077783	17.223	42.53
S5	116824456	11.625	42.21
S6	103444952	10.294	43.11
S7	15435017	1.536	43.14
scaffold_43_arrow_ctg1	900911	0.09	40.57
scaffold_49_arrow_ctg1	489531	0.049	42.74
scaffold_54_arrow_ctg1	278815	0.028	42.59
scaffold_57_arrow_ctg1	166227	0.017	45.21
scaffold_58_arrow_ctg1	152185	0.015	59
scaffold_59_arrow_ctg1	147520	0.015	37.75
scaffold_60_arrow_ctg1	90749	0.009	45.61
scaffold_61_arrow_ctg1	84925	0.008	43.54
scaffold_62_arrow_ctg1	68247	0.007	36.93
scaffold_64_arrow_ctg1	63031	0.006	42.66
scaffold_65_arrow_ctg1	58701	0.006	27.2
scaffold_75_arrow_ctg1	15732	0.002	46.24
scaffold_76_arrow_ctg1	11090	0.001	41.22
Genome total	1004932590	100	42.46
Scaffold level assembly statistics and GC (%) content.
